1 **Cloning of the rice *Xo1* resistance gene and interaction of the *Xo1* protein with**  
2 **the defense-suppressing *Xanthomonas* effector Tal2h**

3

4 Andrew C. Read,<sup>1†</sup> Mathilde Hutin,<sup>1,2†</sup> Matthew J. Moscou,<sup>3</sup> Fabio C. Rinaldi,<sup>1</sup> and  
5 Adam J. Bogdanove<sup>1\*</sup>

6

7 <sup>1</sup> Plant Pathology and Plant-Microbe Biology Section, School of Integrative Plant  
8 Science, Cornell University, Ithaca, NY 14853

9 <sup>2</sup> IRD, CIRAD, Université Montpellier, IPME, 34000 Montpellier, France

10 <sup>3</sup> The Sainsbury Laboratory, University of East Anglia, Norwich Research Park, Norwich,  
11 NR4 7UK, United Kingdom

12 <sup>†</sup> These authors contributed equally.

13 Current address for F. C. Rinaldi: Vertex Pharmaceuticals, 50 Northern Avenue, Boston,  
14 MA 02210

15 \* Corresponding author: A. J. Bogdanove; [ajb7@cornell.edu](mailto:ajb7@cornell.edu)

16

17 **Keywords:** Resistance genes, effectors, defense suppression, nucleotide binding  
18 leucine-rich repeat (NLR), transcription activator-like effector (TALE), truncTALE, mass  
19 spectrometry, protein-protein interaction

20

21 **Funding:**

22 1. National Science Foundation (IOS-1444511 to AB)

- 23        2. National Institute of Food and Agriculture, U.S. Department of Agriculture (2018-  
24            67011-28025 to AR)
- 25        3. Gatsby Charitable Foundation (to MM)

26

## 27 **Abstract**

28

29 The *Xo1* locus in the heirloom rice variety Carolina Gold Select confers resistance to  
30 bacterial leaf streak and bacterial blight, caused by *Xanthomonas oryzae* pvs. *oryzicola*  
31 and *oryzae*, respectively. Resistance is triggered by pathogen-delivered transcription  
32 activator-like effectors (TALEs) independent of their ability to activate transcription, and  
33 is suppressed by variants called truncTALEs common among Asian strains. By  
34 transformation of the susceptible variety Nipponbare, we show that one of 14  
35 nucleotide-binding, leucine-rich repeat (NLR) protein genes at the locus, with a zfBED  
36 domain, is the *Xo1* gene. Analyses of published transcriptomes revealed that the *Xo1*-  
37 mediated response is similar to those of NLR resistance genes *Pia* and *Rxo1* and  
38 distinct from that associated with induction of the executor resistance gene *Xa23*, and  
39 that a truncTALE dampens or abolishes activation of defense-associated genes by *Xo1*.  
40 In *Nicotiana benthamiana* leaves, fluorescently-tagged *Xo1* protein, like TALEs and  
41 truncTALEs, localized to the nucleus. And, endogenous *Xo1* specifically co-  
42 immunoprecipitated from rice leaves with a pathogen-delivered, epitope-tagged  
43 truncTALE. These observations suggest that suppression of *Xo1*-function by  
44 truncTALEs occurs through direct or indirect physical interaction. They further suggest

45 that effector co-immunoprecipitation may be effective for identifying or characterizing  
46 other resistance genes.

47

48

49 Bacterial leaf streak of rice, caused by *Xanthomonas oryzae* pv. *oryzicola* (Xoc), is an  
50 increasing threat to production in many parts of the world, especially in Africa. Bacterial  
51 blight of rice, caused by *X. oryzae* pv. *oryzae* (Xoo) has long been a major constraint in  
52 Asia and is becoming prevalent in Africa. The purified American heirloom rice variety  
53 Carolina Gold Select (hereafter Carolina Gold; McClung and Fjellstrom, 2010) is  
54 resistant to all tested African strains of Xoc and some tested strains of Xoo (Read et al.,  
55 2016). Using an African strain of Xoc, the resistance was mapped to chromosome 4 and  
56 designated as *Xo1* (Triplett et al., 2016). Both Xoc and Xoo deploy multiple type III-  
57 secreted transcription activator-like effectors (TALEs) during infection. TALEs enter the  
58 plant nucleus and bind to promoters, each with different sequence specificity, to  
59 transcriptionally activate effector-specific target genes (Perez-Quintero and Szurek,  
60 2019). Some of these genes, called susceptibility genes, contribute to disease  
61 development (Hutin et al., 2015). In some host genotypes, a TALE may activate a so-  
62 called executor resistance gene, leading to host cell death that stops the infection  
63 (Bogdanove et al., 2010). Most of the cloned resistance genes for bacterial blight are in  
64 fact executor genes (Zhang et al., 2015). *Xo1* is different. It mediates resistance in  
65 response to TALEs with distinct DNA-binding specificities independent of their ability to  
66 activate transcription (Triplett et al., 2016). Also, unlike executor genes, *Xo1* function is  
67 suppressed by a variant class of these effectors known as truncTALEs (also called

68 iTALEs). Like TALEs, TruncTALEs nuclear localize (Ji et al., 2016), however due to  
69 large N and C terminal deletions they do not bind DNA (Read et al., 2016).

70 *Xo1* maps to a region that in the reference rice genome (cv. Nipponbare)  
71 contains seven nucleotide-binding, leucine-rich repeat protein genes (“NLR” genes)  
72 (Triplett et al., 2016). NLR genes are the largest class of plant disease resistance genes.  
73 NLR proteins recognize specific, corresponding pathogen effector proteins through  
74 direct interaction or by detecting effector-dependent changes of host target proteins,  
75 and mediate downstream defense signaling that leads to expression of defense genes  
76 and a programmed localized cell death, the hypersensitive reaction (HR) (Lolle et al.,  
77 2020). Recently, by whole genome sequencing, we determined that the *Xo1* locus in  
78 Carolina Gold comprises 14 NLR genes. We identified one of these, *Xo1<sub>11</sub>*, as a strong  
79 candidate based on its structural similarity to the previously cloned and only known NLR  
80 resistance gene for bacterial blight, *Xa1* (Read et al., 2020). *Xa1*, originally identified in  
81 the rice variety Kogyoku, maps to the same location (Yoshimura et al., 1998) and  
82 behaves similarly to *Xo1*: it mediates recognition of TALEs with distinct DNA-binding  
83 specificities (and thus confers resistance also to bacterial leaf streak), and its activity is  
84 suppressed by truncTALEs (Ji et al., 2016). *Xo1<sub>11</sub>* and *Xa1* are members of a small  
85 subfamily of NLR genes that encode an unusual N-terminal domain comprising a zinc  
86 finger BED (zfBED) motif (Read et al., 2020).

87 To ascertain whether *Xo1<sub>11</sub>* is the gene responsible for *Xo1* resistance, we  
88 generated transgenic Nipponbare plants expressing it. For transformation, we amplified  
89 the genomic *Xo1<sub>11</sub>* coding sequence (5,882 bp) as well as the 993 bp region upstream  
90 of the start codon and cloned them together into a binary vector with a 35S terminator.

91 T0 *Xo1<sub>11</sub>* plants were inoculated by syringe infiltration with African Xoc strain CFBP7331,  
92 which has no truncTALE of its own, carrying either an empty vector (EV) or the plasmid-  
93 borne truncTALE gene *tal2h* (p2h) from the Asian Xoc strain BLS256 (Read et al., 2016).  
94 Phenotypes of CFBP7331(EV) and CFBP7331(p2h) were confirmed on untransformed  
95 Nipponbare and Carolina Gold plants (**Fig. S1**). Plants from two *Xo1<sub>11</sub>* transformation  
96 events displayed resistance to the strain with the EV, but not to the strain carrying Tal2h  
97 (**Fig. 1**), demonstrating that *Xo1<sub>11</sub>* is the *Xo1* gene.

98 NLR protein activation is characteristically followed by a suite of responses that  
99 includes massive transcriptional reprogramming leading both to HR and to activation of  
100 a large number of defense-associated genes (Cui et al., 2015). To gain insight into the  
101 nature of *Xo1*-mediated resistance, we compared the global profile of differentially  
102 expressed genes during *Xo1*-mediated defense to those of two other NLR genes in rice  
103 and to the profile associated with an executor gene. We used our previously reported  
104 RNAseq data from Carolina Gold plants inoculated with CFBP7331(EV) or mock  
105 inoculum (Read et al., 2020), data for the NLR gene *Pia* for resistance to the rice blast  
106 pathogen *Magnaporthe oryzae* (Tanabe et al., 2014), data from rice resistant to  
107 bacterial leaf streak due to transgenic expression of the maize NLR gene *Rxo1* (Xie et  
108 al., 2007; Zhou et al., 2010), and data for the transcriptomic response associated with  
109 induction of the executor resistance gene *Xa23* by an *Xoo* strain with the corresponding  
110 TALE (Tariq et al., 2018). Though limited, these datasets include the only currently  
111 available expression data for NLR and executor gene-mediated resistance to  
112 *Xanthomonas* in rice. Differentially expressed genes ( $\log_2$ -fold change  $>1$  or  $<-1$ ;  $p$ -  
113 value  $>0.05$ ) in the comparison between pathogen-inoculated and mock-inoculated

114 plants were compared across the four datasets. The total number of DEGs ranged from  
115 10,050 for *Xo1* to 628 for *Xa23*, and the overall profiles were largely distinct (**Fig. 2A**,  
116 **Table S1**). For each resistance gene, there were a number of DEGs found only in the  
117 pathogen to mock comparison for that dataset, and this was highest for *Xo1* (7,121  
118 genes) (**Fig. 2A, Table S1**). Differences among the overall DEG profiles may be  
119 influenced by the expression assay (RNAseq vs. microarray), pathogen, annotation, or  
120 timepoints used. To compare the responses further the expression of 340 rice genes  
121 associated with plant defense response (gene ontology group 0006952) was examined.  
122 The *Xo1* profile comprised the largest number of plant defense DEGs (99) and had  
123 more DEGs in common with the other NLR-mediated responses (16 with *Rxo1* and 26  
124 with *Pia*) than with the executor gene response (8) (Fig. 2B). Additionally, each of the  
125 NLR-mediated responses resulted in a larger number of differentially expressed  
126 defense genes (26 for *Rxo1*, 41 for *Pia*) than the *Xa23* response (14), and based on  
127 principle component analysis of the defense DEG profiles, were more similar to one  
128 another than to the executor gene response (**Fig. 2B and C and Table S2**).

129 We also compared DEGs relative to mock in Carolina Gold plants inoculated with  
130 CFBP7331(EV) and Carolina Gold plants inoculated with CFBP7331(p2h) (Read et al.,  
131 2020), to gain insight into how *Xo1*-mediated resistance is overcome by a pathogen  
132 delivering a truncTALE. In contrast to the 99 defense response genes differentially  
133 expressed in response to CFBP7331(EV), only 18 defense genes were differentially  
134 expressed in response to CFBP7331(p2h) (**Fig. 2C**). Of these 18 genes, 7 were  
135 differentially expressed only in the response to the strain with *tal2h*, 4 up and 3 down.  
136 Of the remaining 11, 4 were up and 2 were down in both responses, but each less so in

137 the response to the strain with *tal2h*. The other 5 moved in opposite directions entirely,  
138 up in the absence but repressed in the presence of *tal2h*, relative to mock. This  
139 expression profile during suppression of *Xo1*-mediated resistance is consistent with  
140 *Tal2h* functioning early in the defense cascade. The bacterial leaf streak susceptibility  
141 gene *OsSULTR3;6* (Cernadas et al., 2014), activated by *Tal8e* of CFBP7331 (Wilkins et  
142 al., 2015), is strongly induced by both CFBP7331(EV) and CFBP7331(p2h), indicating  
143 that TALE function is not compromised by *Xo1* or by *Tal2h*.

144 The observation that *Xo1* reprograms transcription of canonical defense genes  
145 upon recognition of the cognate pathogen effector and that reprogramming by *Xo1* is  
146 essentially blocked by *Tal2h* led us to explore whether *Xo1* localizes to the same  
147 subcellular location as TALEs and truncTALEs. Some, but not all, NLR proteins nuclear  
148 localize (Shen et al., 2007; Wirthmueller et al., 2007; Caplan et al., 2008; Cheng et al.,  
149 2009), and we previously identified putative nuclear localization signals (NLSs) in *Xo1*<sub>11</sub>  
150 (Read et al., 2020). We generated expression constructs for a green fluorescent protein  
151 (GFP) fusion to the N-terminus of *Xo1* as well as an N-terminal monomeric red  
152 fluorescent protein (mRFP) fusion both to a TALE (*Tal1c* of *Xoc* BLS256) and to *Tal2h*.  
153 These constructs were delivered into *Nicotiana benthamiana* leaves using *A.*  
154 *tumefaciens* strain GV3101, and the leaves imaged with a Zeiss 710 confocal  
155 microscope (**Fig. 3**). GFP-*Xo1* in the absence of either effector but with free mRFP  
156 localized to foci that appeared to be nuclei. Co-expression with mRFP-*Tal1c* or with  
157 mRFP-*Tal2h* confirmed that these foci were nuclei.

158 The localization of *Xo1*, the TALE, and the truncTALE to the nucleus when  
159 transiently expressed in *N. benthamiana* led us to pursue the hypothesis that *Xo1*

160 physically interacts with one or both of these proteins in the native context. We  
161 generated plasmid constructs that add a 3x FLAG tag to the C-terminus of TALE Tal1c  
162 or the truncTALE Tal2h (Tal1c-FLAG and Tal2h-FLAG) and introduced them individually  
163 into the TALE-deficient *X. oryzae* strain X11-5A (Triplett et al., 2011) for co-  
164 immunoprecipitation from inoculated Carolina Gold leaves (**Fig. 4**). Abilities of the  
165 tagged TALE and truncTALE to respectively trigger and suppress *Xo1*-mediated  
166 resistance were confirmed (**Fig. S2**). We included also a plasmid for expression of a  
167 second, untagged TALE (Tal3c from BLS256) and a plasmid for untagged Tal2h. By  
168 pairing the X11-5A transformants with each other or with the untransformed control  
169 strain, we were able to probe for Carolina Gold proteins interacting with the tagged  
170 TALE or truncTALE, and for interactions of these proteins with each other or with the  
171 second TALE. Select combinations were inoculated to Nipponbare leaves for  
172 comparison. Inoculation was done by syringe infiltration, in 30-40 contiguous spots on  
173 each side of the leaf midrib. For each co-inoculation, tissue was harvested at 48 hours  
174 and ground in liquid N<sub>2</sub>, then soluble extract was incubated with anti-FLAG agarose  
175 beads and washed to immunopurify the tagged and interacting proteins.  
176 Immunoprecipitates were eluted, and an aliquot of each was subjected to western  
177 blotting with anti-TALE antibody (**Fig. S3**). The remainders were then resolved on a 4-  
178 20% SDS-PAGE and eluates from gel slices containing proteins between approximately  
179 60 and 300 kDa (**Fig. S4**) were digested and the peptides analyzed by mass  
180 spectrometry. Proteins were considered present in a sample if at least three peptides  
181 mapped uniquely to any of the pertinent annotated genomes searched: the *X. oryzae*  
182 strain X11-5A genome (Triplett et al., 2011) plus the TALE(s) or TruncTALE being



183 expressed, the Nipponbare genome (MSU 7; Kawahara et al., 2013), and the Carolina  
184 Gold genome (Read et al., 2020). For the Carolina Gold genome, we re-annotated  
185 using the RNAseq data from CFBP7331(EV), CFBP7331(p2h), and mock-inoculated  
186 plants cited earlier. We carried out the experiment twice.

187 In the western blot for each experiment (**Fig. S3**), we detected the tagged TALE  
188 or truncTALE in each corresponding sample, with the exception of a Tal1c-  
189 FLAG/Tal3c/Nipponbare sample in the first experiment. No Tal3c or untagged Tal2h  
190 was detected in any sample. The mass spectrometry confirmed these observations,  
191 suggesting that neither TALEs with truncTALEs nor TALEs with other TALEs interact  
192 appreciably (**Fig. 4**). Xo1 was consistently detected in the Carolina Gold/Tal2h-FLAG  
193 samples, irrespective of any co-delivered Tal1c or Tal3c, and not in the Tal1c-FLAG  
194 samples or any other sample (**Fig. 4**). No other protein consistently co-purified with  
195 Tal2h-FLAG or Tal1c-FLAG in either Carolina Gold or Nipponbare samples (**Dataset**  
196 **S1**).

197 In summary, we have shown that 1) an NLR protein gene at the *Xo1* locus,  
198 harboring an integrated zfBED domain, is *Xo1*; 2) the *Xo1*-mediated response is more  
199 similar to those mediated by two other NLR resistance genes than it is to the response  
200 associated with TALE-specific transcriptional activation of an executor resistance gene;  
201 3) a truncTALE abolishes or dampens activation of defense-associated genes by *Xo1*;  
202 4) the *Xo1* protein, like TALEs and truncTALEs, localizes to the nucleus, and 5) *Xo1*  
203 specifically co-immunoprecipitates from rice leaves with a pathogen-delivered, epitope-  
204 tagged truncTALE. Thus, *Xo1* is an allele or paralog of *Xa1*, and suppression of *Xo1*  
205 function by a truncTALE is likely the result of physical interaction between the

206 resistance protein and the effector. The latter prediction is consistent with the Xo1 DEG  
207 profile during suppression by Tal2h, which suggested that Tal2h functions early in the  
208 defense cascade, perhaps by blocking TALE recognition by Xo1.

209         Whether the interaction between Tal2h and Xo1 is direct or indirect is not certain,  
210 but the fact that no other protein was detected consistently that co-immunoprecipitated  
211 with Tal2h and Xo1 suggests the interaction is direct. It is tempting to speculate also  
212 that TALEs trigger Xo1-mediated resistance by direct interaction with the protein and  
213 that truncTALEs function by disrupting the association. Though Tal1c did not pull down  
214 Xo1, this might be explained by its lower apparent abundance, based on the western  
215 blots. Tal1c might interact weakly or transiently with Xo1, or any complex of the proteins  
216 in the plant cells may have begun to degrade with the developing HR at the 48 hour  
217 time point sampled. It is also possible that Tal2h interacts with TALEs and masks them  
218 from the resistance protein, but both our co-immunoprecipitation results and the fact  
219 that Tal2h does not impact TALE activation of the *OsSULTR3;6* susceptibility suggest  
220 that this is not the case. An alternative hypothesis is that Xo1 recognition of TALEs is  
221 not mediated by a direct interaction between the two proteins.

222         The results presented constitute an important step toward understanding how  
223 Xo1 works, and how its function can be suppressed by the pathogen. Toward  
224 determining the relationship of the interaction to defense suppression, an immediate  
225 next step might be structure function analysis of the interaction to determine the  
226 portion(s) of Xo1 and Tal2h involved. For Xo1, the LRR may be the determinative  
227 interacting domain. Our previous comparison of the motifs present in Xo1<sub>11</sub>, Xa1, and  
228 the closest Nipponbare homolog (Nb-xo1<sub>5</sub>, which is expressed) revealed that the zfBED

229 and CC domains are identical and the NB-ARC domains nearly so (Read et al., 2020).  
230 In contrast, the leucine rich repeat domain of Nb-xo1<sub>5</sub> differs markedly from those of  
231 Xo1 and Xa1, which, with the exception of an additional repeat in Xa1, are very similar.  
232 Supporting this hypothesis, differences in the LRR determine the pathogen race  
233 specificities of some flax rust resistance genes (Ellis et al., 1999). More broadly, the  
234 ability of tagged Tal2h to pull down Xo1 suggests that effector co-immunoprecipitation  
235 may be an effective approach to characterizing pathogen recognition mechanisms of  
236 other resistance proteins, or for identifying a resistance gene *de novo*.

237 While this paper was under review, Ji and colleagues (Ji et al., 2020) presented  
238 the cloning and functional characterization of several *Xa1* homologs, which also  
239 demonstrated that *Xo1*<sub>11</sub> is *Xo1*.

240

241

## 242 **Figure legends**

243

244 **Fig. 1.** Transgenic Nipponbare plants expressing Xo1<sub>11</sub> are resistant to African Xoc  
245 strain CFBP7331 and the resistance suppressed by a truncTALE. Susceptible cultivar  
246 Nipponbare was transformed with pAR902, and leaves of T0 plants from two events  
247 were syringe-infiltrated with African Xoc strain CFBP7311 carrying either empty vector  
248 (EV) or *tal2h* (p2h) adjusted to OD<sub>600</sub> 0.4. Leaves were photographed on a light box at 4  
249 days after inoculation. Resistance is apparent as HR (necrosis) at the site of inoculation  
250 and disease as expanded, translucent watersoaking.

251

252 **Fig. 2.** The Xo1-mediated transcriptomic response is similar to those of other NLR  
253 genes and is essentially eliminated by Tal2h. **A**, Expression heatmaps (columns)  
254 showing all differentially expressed genes (DEGs) in plants undergoing the resistant  
255 response compared to mock inoculated plants for *Xo1*, the NLR genes *Pia* and *Rxo1*,  
256 and the executor resistance gene *Xa23*. White numbers for each on the heatmap  
257 indicate the number of DEGs specific to each response (see **Table S1**). Total numbers  
258 of DEGs are indicated below. **B**, Heatmaps for the subset of DEGs from (A) that belong  
259 to gene ontology group 0006952, defense response, with totals displayed at bottom. **C**,  
260 Principal component analysis. The first two principal components (PC) explain 54.0%  
261 and 31.6% of the variation with a total of 85.6%. PC1 demarcated two major clusters: 1)  
262 *Xo1*, *Pia*, and *Rxo1*, and 2) *Xa23* **D**, Heatmaps for the 18 defense response DEGs  
263 identified in the comparison of Carolina Gold plants inoculated with CFBP7331(p2h) to  
264 mock inoculated plants. The “EV” heatmap shows their expression relative to mock in  
265 Carolina Gold plants inoculated with CFBP7331(EV) (resistance), and the “p2h” column  
266 shows their expression relative to mock in the presence of Tal2h (disease). The DEGs  
267 have been divided into five categories: **I**, induced in both; **II**, down-regulated in both; **III**,  
268 induced in resistance and down-regulated in disease; **IV**, not differentially expressed in  
269 resistance and induced in disease; and **V**, not differentially expressed in resistance and  
270 down-regulated in disease.

271  
272 **Fig. 3.** Xo1 localizes to the nucleus. Using *Agrobacterium* co-infiltrations, an expression  
273 construct for Xo1 with GFP at the N-terminus (GFP-Xo1) together with a p19 silencing  
274 suppressor construct were introduced into *Nicotiana benthamiana* leaves alone or with

275 a construct for mRFP, mRFP fused to TALE Tal1c (mRFP-Tal1c), or mRFP fused to the  
276 truncTALE Tal2h (mRFP-Tal2h). Confocal image stacks were taken at 3 days after  
277 inoculation and are presented as maximum intensity projections. Insets are  
278 magnifications of individual nuclei. The scale bars represent 50  $\mu\text{m}$ .

279

280 **Fig. 4.** Xo1 co-immunoprecipitates with Tal2h. **Top**, strategy used for co-  
281 immunoprecipitation (Co-IP) of truncTALE Tal2h or TALE Tal1c and any interactors.  
282 Plasmid borne expression constructs for Tal2h or Tal1c with a C-terminal 3x FLAG tag,  
283 as well as untagged Tal2h and a second TALE, Tal3c were introduced into  
284 *Xanthomonas oryzae* strain X11-5. Paired combinations of the transformants with each  
285 other or with the untransformed control strain, or the control strain alone, were co-  
286 infiltrated into leaves of rice varieties Carolina Gold and Nipponbare at a final OD<sub>600</sub> 0.5  
287 for each transformant. Samples were collected 48 hours after inoculation, ground, and  
288 sonicated before Co-IP using anti-FLAG agarose beads. After elution and SDS-PAGE  
289 separation, proteins between approximately 60 and 300 kDa were eluted, digested and  
290 analyzed by mass spectrometry. The experiment was conducted twice. **Bottom**, co-IP  
291 results. For each immunoprecipitate, the numbers of unique peptides detected that  
292 matched Tal2h, Tal3c, Tal1c, or Xo1 in each experiment are shown. “-” indicates that  $\leq$   
293 2 unique peptides were detected.

294

295

296 **Acknowledgments**

297

298 The authors thank M. Carter and B. Szurek for critical reading of the manuscript,  
299 Matthew Willmann and the Plant Transformation Facility of Cornell's School of  
300 Integrative Plant Science for carrying out the rice transformation, Sandra Harrington and  
301 Susan McCouch for assistance growing the regenerants, and Ruchika Bhawal and  
302 Elizabeth Anderson at the Proteomics Facility of the Biotechnology Resource Center at  
303 the Cornell University's Institute of Biotechnology (BRC) for conducting the mass  
304 spectrometry. Confocal microscopy was carried out at the BRC's Imaging Facility. This  
305 work was supported by the Plant Genome Research Program of the National Science  
306 Foundation (IOS-1444511 to AB), the National Institute of Food and Agriculture of the  
307 U.S. Department of Agriculture (2018-67011-28025 to AR), and the Gatsby Charitable  
308 Foundation (to MM). We also acknowledge support from the National Institutes of  
309 Health to the Proteomics Facility for the Orbitrap Fusion mass spectrometer (shared  
310 instrumentation grant 1S10 OD017992-01) and to the Imaging Facility for the Zeiss LSM  
311 710 confocal microscope (shared instrumentation grant S10RR025502).

312

313

#### 314 **Author contributions**

315

316 AR, MH, FR, and AB conceived and designed the study; AR, MH, and FR carried out  
317 the experiments; AR, MH, FR, MM, and AB analyzed data; AR, MH, and AB wrote the  
318 manuscript.

319

320

321 **Supplemental files**

322

323 **1. Supplemental text and figures**

324

325 **Materials and methods**

326

327 **Fig. S1.** Confirmation of CFBP7331(EV) and CFBP(p2h) inoculum on  
328 Nipponbare and Carolina Gold plants.

329

330 **Fig. S2.** Symptoms on Carolina Gold and Nipponbare leaves caused by  
331 inoculum used for the co-IP experiments.

332

333 **Fig. S3.** Western blot of immunoprecipitates using anti-TALE antibody.

334

335 **Fig. S4.** SDS-PAGE of immunoprecipitates and size range excised for mass  
336 spectrometry.

337

338 **Supplemental references**

339

340 **2. Supplemental tables**

341

342 **Table S1.** DEGs in Fig. 2A (all DEGS)

343

344 **Table S2.** DEGs in Fig. 2B (GO:0006952 DEGs)

345

346 **Table S3.** DEGs in Fig. 2C (GO:0006952 in disease)

347

348 **3. Dataset S1.** Mass spectrometry data

349

350

351 **References**

352

353 Bogdanove, A.J., Schornack, S., and Lahaye, T. 2010. TAL effectors: finding plant  
354 genes for disease and defense. *Curr. Opin. Plant Biol.* 13:394-401.

355 Caplan, J.L., Mamillapalli, P., Burch-Smith, T.M., Czymmek, K., and Dinesh-Kumar, S.P.  
356 2008. Chloroplastic protein NRIP1 mediates innate immune receptor recognition  
357 of a viral effector. *Cell* 132:449-462.

358 Cernadas, R.A., Doyle, E.L., Nino-Liu, D.O., Wilkins, K.E., Bancroft, T., Wang, L.,  
359 Schmidt, C.L., Caldo, R., Yang, B., White, F.F., Nettleton, D., Wise, R.P., and  
360 Bogdanove, A.J. 2014. Code-assisted discovery of TAL effector targets in  
361 bacterial leaf streak of rice reveals contrast with bacterial blight and a novel  
362 susceptibility gene. *PLoS Path.* 10:e1003972.

363 Cheng, Y.T., Germain, H., Wiermer, M., Bi, D., Xu, F., Garcia, A.V., Wirthmueller, L.,  
364 Despres, C., Parker, J.E., Zhang, Y., and Li, X. 2009. Nuclear pore complex  
365 component MOS7/Nup88 is required for innate immunity and nuclear  
366 accumulation of defense regulators in Arabidopsis. *Plant Cell* 21:2503-2516.



- 367 Cui, H., Tsuda, K., and Parker, J.E. 2015. Effector-triggered immunity: from pathogen  
368 perception to robust defense. *Annu. Rev. Plant Biol.* 66:487-511.
- 369 Ellis, J.G., Lawrence, G.J., Luck, J.E., and Dodds, P.N. 1999. Identification of regions in  
370 alleles of the flax rust resistance gene *L* that determine differences in gene-for-  
371 gene specificity. *Plant Cell* 11:495-506.
- 372 Hutin, M., Perez-Quintero, A.L., Lopez, C., and Szurek, B. 2015. MorTAL Kombat: the  
373 story of defense against TAL effectors through loss-of-susceptibility. *Front. Plant*  
374 *Sci.* 6:535.
- 375 Ji, C., Ji, Z., Liu, B., Cheng, H., Liu, H., Liu, S., Yang, B., and Chen, G. 2020. *Xa1* allelic  
376 *R* genes activate rice blight resistance suppressed by Interfering TAL effectors.  
377 *Plant Communications*:100087.
- 378 Ji, Z., Ji, C., Liu, B., Zou, L., Chen, G., and Yang, B. 2016. Interfering TAL effectors of  
379 *Xanthomonas oryzae* neutralize *R*-gene-mediated plant disease resistance. *Nat.*  
380 *Commun.* 7:13435.
- 381 Kawahara, Y., de la Bastide, M., Hamilton, J.P., Kanamori, H., McCombie, W.R.,  
382 Ouyang, S., Schwartz, D.C., Tanaka, T., Wu, J., and Zhou, S. 2013.  
383 Improvement of the *Oryza sativa* Nipponbare reference genome using next  
384 generation sequence and optical map data. *Rice* 6:4.
- 385 Lolle, S., Stevens, D., and Coaker, G. 2020. Plant NLR-triggered immunity: from  
386 receptor activation to downstream signaling. *Curr. Opin. Immunol.* 62:99-105.
- 387 McClung, A., and Fjellstrom, R. 2010. Using molecular genetics as a tool to identify and  
388 refine “Carolina Gold”. Pages 37-41 in: *The Golden Seed: Writings on the History*

389 and Culture of Carolina Gold Rice, D.S. Shields, ed. Douglas W. Bostick for the  
390 Carolina Gold Rice Foundation.

391 Perez-Quintero, A.L., and Szurek, B. 2019. A decade decoded: spies and hackers in the  
392 history of TAL effectors research. *Annu. Rev. Phytopathol.* 57:459-481.

393 Read, A.C., Rinaldi, F.C., Hutin, M., He, Y.Q., Triplett, L.R., and Bogdanove, A.J. 2016.  
394 Suppression of *Xo1*-mediated disease resistance in rice by a truncated, non-  
395 DNA-binding TAL effector of *Xanthomonas oryzae*. *Front. Plant Sci.* 7:1516.

396 Read, A.C., Moscou, M.J., Zimin, A.V., Pertea, G., Meyer, R.S., Purugganan, M.D.,  
397 Leach, J.E., Triplett, L.R., Salzberg, S.L., and Bogdanove, A.J. 2020. Genome  
398 assembly and characterization of a complex zfBED-NLR gene-containing  
399 disease resistance locus in Carolina Gold Select rice with Nanopore sequencing.  
400 *PLoS Genet.* 16:e1008571.

401 Shen, Q.H., Saijo, Y., Mauch, S., Biskup, C., Bieri, S., Keller, B., Seki, H., Ulker, B.,  
402 Somssich, I.E., and Schulze-Lefert, P. 2007. Nuclear activity of MLA immune  
403 receptors links isolate-specific and basal disease-resistance responses. *Science*  
404 315:1098-1103.

405 Tanabe, S., Yokotani, N., Nagata, T., Fujisawa, Y., Jiang, C., Abe, K., Ichikawa, H.,  
406 Mitsuda, N., Ohme-Takagi, M., Nishizawa, Y., and Minami, E. 2014. Spatial  
407 regulation of defense-related genes revealed by expression analysis using  
408 dissected tissues of rice leaves inoculated with *Magnaporthe oryzae*. *J. Plant*  
409 *Physiol. Pathol.* 2:1000135.

- 410 Tariq, R., Wang, C., Qin, T., Xu, F., Tang, Y., Gao, Y., Ji, Z., and Zhao, K. 2018.  
411 Comparative transcriptome profiling of rice near-isogenic line carrying *Xa23*  
412 under infection of *Xanthomonas oryzae* pv. *oryzae*. *Int. J. Mol. Sci.* 19:717.
- 413 Triplett, L.R., Hamilton, J.P., Buell, C.R., Tisserat, N.A., Verdier, V., Zink, F., and Leach,  
414 J.E. 2011. Genomic analysis of *Xanthomonas oryzae* isolates from rice grown in  
415 the United States reveals substantial divergence from known *X. oryzae*  
416 pathovars. *Appl. Environ. Microbiol.* 77:3930-3937.
- 417 Triplett, L.R., Cohen, S.P., Heffelfinger, C., Schmidt, C.L., Huerta, A.I., Tekete, C.,  
418 Verdier, V., Bogdanove, A.J., and Leach, J.E. 2016. A resistance locus in the  
419 American heirloom rice variety Carolina Gold Select is triggered by TAL effectors  
420 with diverse predicted targets and is effective against African strains of  
421 *Xanthomonas oryzae* pv. *oryzicola*. *Plant J.* 87:472-483.
- 422 Wilkins, K.E., Booher, N.J., Wang, L., and Bogdanove, A.J. 2015. TAL effectors and  
423 activation of predicted host targets distinguish Asian from African strains of the  
424 rice pathogen *Xanthomonas oryzae* pv. *oryzicola* while strict conservation  
425 suggests universal importance of five TAL effectors. *Front. Plant Sci.* 6:536.
- 426 Wirthmueller, L., Zhang, Y., Jones, J.D., and Parker, J.E. 2007. Nuclear accumulation of  
427 the Arabidopsis immune receptor RPS4 is necessary for triggering EDS1-  
428 dependent defense. *Curr. Biol.* 17:2023-2029.
- 429 Xie, X.W., Yu, J., Xu, J.L., Zhou, Y.L., and Li, Z.K. 2007. [Introduction of a non-host  
430 gene *Rxo1* cloned from maize resistant to rice bacterial leaf streak into rice  
431 varieties]. *Sheng Wu Gong Cheng Xue Bao* 23:607-611.

- 432 Yoshimura, S., Yamanouchi, U., Katayose, Y., Toki, S., Wang, Z.X., Kono, I., Kurata, N.,  
433 Yano, M., Iwata, N., and Sasaki, T. 1998. Expression of *Xa1*, a bacterial blight-  
434 resistance gene in rice, is induced by bacterial inoculation. Proc. Natl. Acad. Sci.  
435 USA 95:1663-1668.
- 436 Zhang, J., Yin, Z., and White, F. 2015. TAL effectors and the executor *R* genes. Front.  
437 Plant Sci. 6:641.
- 438 Zhou, Y.L., Xu, M.R., Zhao, M.F., Xie, X.W., Zhu, L.H., Fu, B.Y., and Li, Z.K. 2010.  
439 Genome-wide gene responses in a transgenic rice line carrying the maize  
440 resistance gene *Rxo1* to the rice bacterial streak pathogen, *Xanthomonas oryzae*  
441 pv. *oryzicola*. BMC Genomics 11:78.
- 442

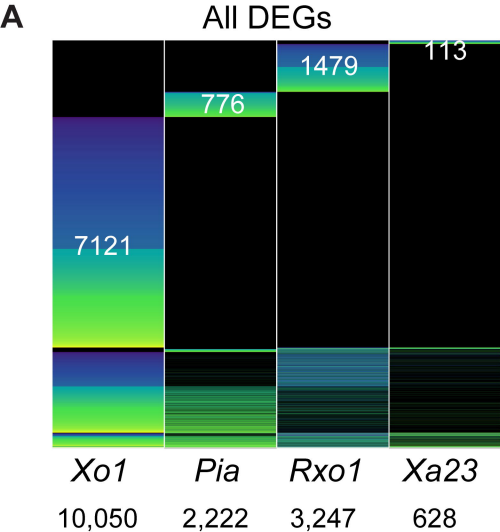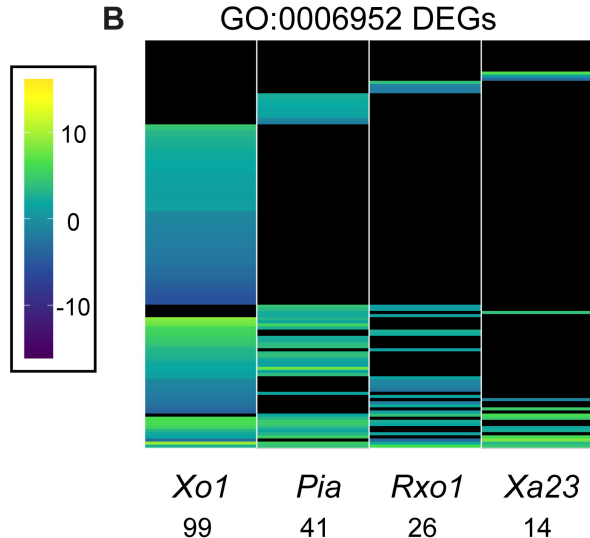

**C** Principal Component Analysis

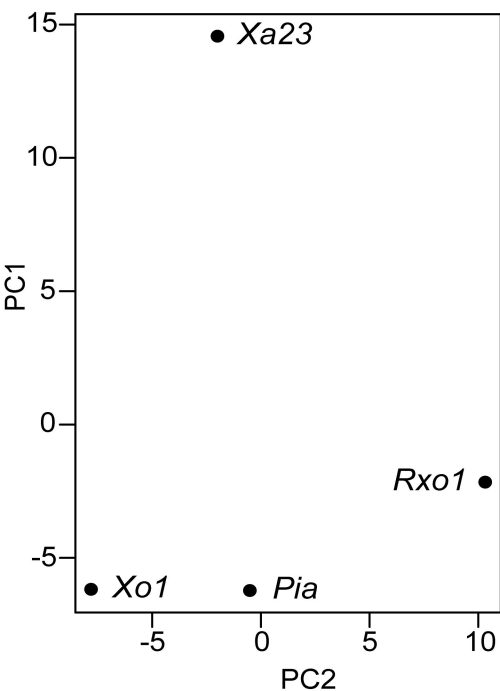

**D** EV and p2h DEGs

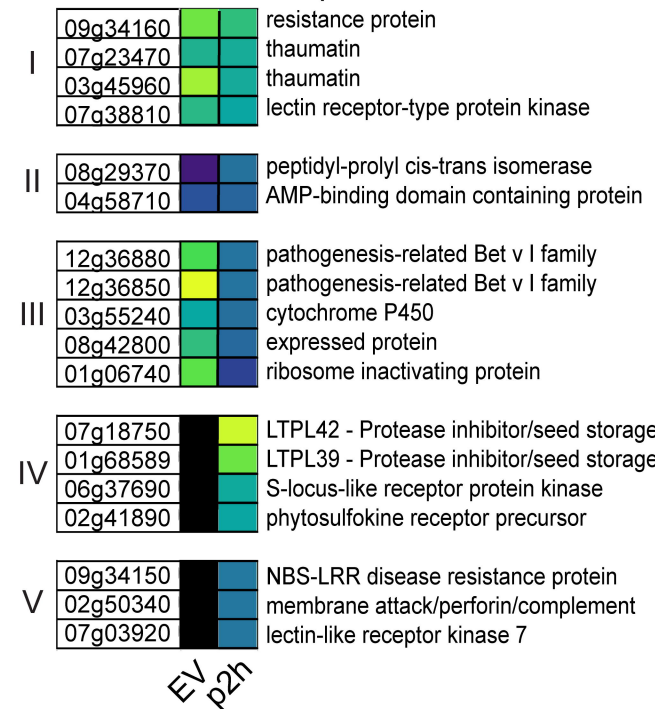

# Xoc CFBP7331

---

Event 1

Event 2

EV      p2h

EV      p2h

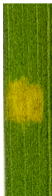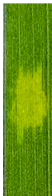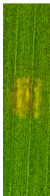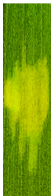

R

D

R

D

Red

Green

Merged

mRFP / GFP-Xo1

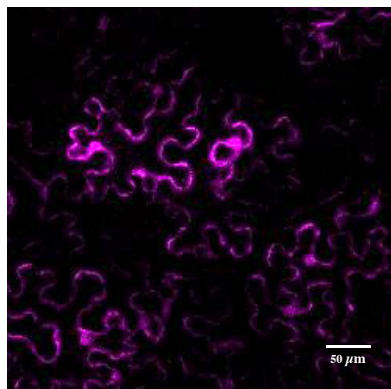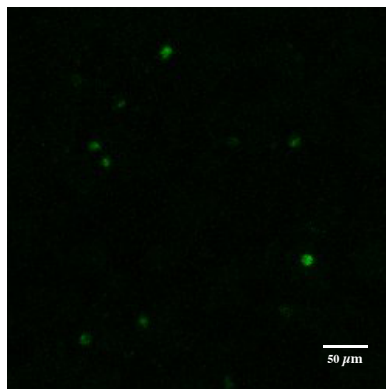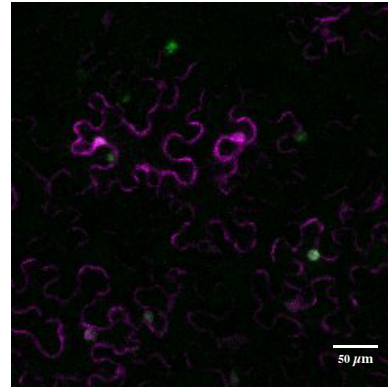

mRFP-Tal1c / GFP-Xo1

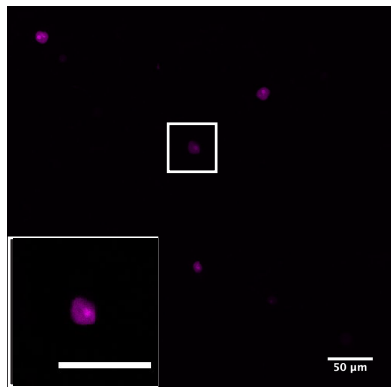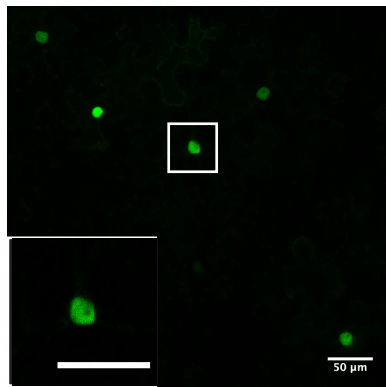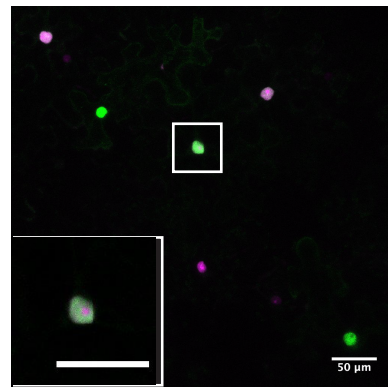

mRFP-Tal2h / GFP-Xo1

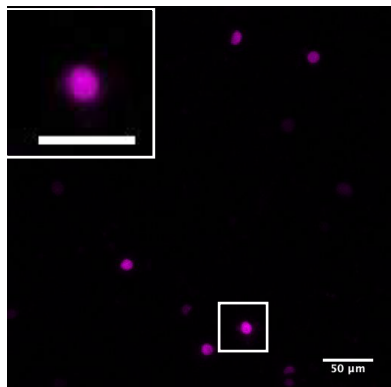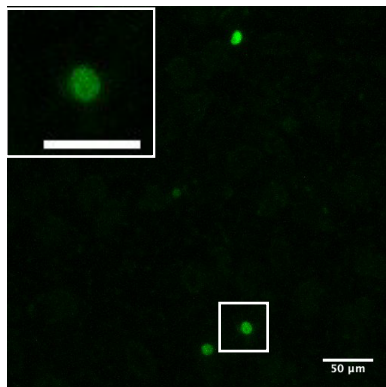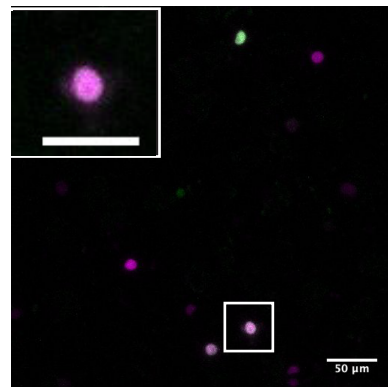

Source: http://biorxiv.org/content/10.1101/2020.05.26.116731v2.full.pdf
