1 **Cloning of the rice *Xo1* resistance gene and interaction of the *Xo1* protein with**  
2 **the defense-suppressing *Xanthomonas* effector Tal2h**

3

4 Andrew C. Read,<sup>1†</sup> Mathilde Hutin,<sup>1,2†</sup> Matthew J. Moscou,<sup>3</sup> Fabio C. Rinaldi,<sup>1</sup> and  
5 Adam J. Bogdanove<sup>1\*</sup>

6

7 <sup>1</sup> Plant Pathology and Plant-Microbe Biology Section, School of Integrative Plant  
8 Science, Cornell University, Ithaca, NY 14853

9 <sup>2</sup> IRD, CIRAD, Université Montpellier, IPME, 34000 Montpellier, France

10 <sup>3</sup> The Sainsbury Laboratory, University of East Anglia, Norwich Research Park, Norwich,  
11 NR4 7UK, United Kingdom

12 <sup>†</sup> These authors contributed equally.

13 Current address for F. C. Rinaldi: Vertex Pharmaceuticals, 50 Northern Avenue, Boston,  
14 MA 02210

15 \* Corresponding author: A. J. Bogdanove; [ajb7@cornell.edu](mailto:ajb7@cornell.edu)

16

17 **Keywords:** Resistance genes, effectors, defense suppression, nucleotide binding  
18 leucine-rich repeat (NLR), transcription activator-like effector (TALE), truncTALE, mass  
19 spectrometry, protein-protein interaction

20

21 **Funding:**

22 1. National Science Foundation (IOS-1444511 to AB)

- 23        2. National Institute of Food and Agriculture, U.S. Department of Agriculture (2018-  
24            67011-28025 to AR)
- 25        3. Gatsby Charitable Foundation (to MM)

26

## 27 **Abstract**

28

29 The *Xo1* locus in the heirloom rice variety Carolina Gold Select confers resistance to  
30 bacterial leaf streak and bacterial blight, caused by *Xanthomonas oryzae* pvs. *oryzicola*  
31 and *oryzae*, respectively. Resistance is triggered by pathogen-delivered transcription  
32 activator-like effectors (TALEs) independent of their ability to activate transcription, and  
33 is suppressed by variants called truncTALEs common among Asian strains. By  
34 transformation of the susceptible variety Nipponbare, we show that one of 14  
35 nucleotide-binding, leucine-rich repeat (NLR) protein genes at the locus, with a zfBED  
36 domain, is the *Xo1* gene. Analyses of published transcriptomes revealed that the *Xo1*-  
37 mediated response is similar to those of NLR resistance genes *Pia* and *Rxo1* and  
38 distinct from that associated with induction of the executor resistance gene *Xa23*, and  
39 that a truncTALE dampens or abolishes activation of defense-associated genes by *Xo1*.  
40 In *Nicotiana benthamiana* leaves, fluorescently-tagged *Xo1* protein, like TALEs and  
41 truncTALEs, localized to the nucleus. And, endogenous *Xo1* specifically co-  
42 immunoprecipitated from rice leaves with a pathogen-delivered, epitope-tagged  
43 truncTALE. These observations suggest that suppression of *Xo1*-function by  
44 truncTALEs occurs through direct or indirect physical interaction. They further suggest

45 that effector co-immunoprecipitation may be effective for identifying or characterizing  
46 other resistance genes.

47

48

49 Bacterial leaf streak of rice, caused by *Xanthomonas oryzae* pv. *oryzicola* (Xoc), is an  
50 increasing threat to production in many parts of the world, especially in Africa. Bacterial  
51 blight of rice, caused by *X. oryzae* pv. *oryzae* (Xoo) has long been a major constraint in  
52 Asia and is becoming prevalent in Africa. The purified American heirloom rice variety  
53 Carolina Gold Select (hereafter Carolina Gold; McClung and Fjellstrom, 2010) is  
54 resistant to all tested African strains of Xoc and some tested strains of Xoo (Read et al.,  
55 2016). Using an African strain of Xoc, the resistance was mapped to chromosome 4 and  
56 designated as *Xo1* (Triplett et al., 2016). Both Xoc and Xoo deploy multiple type III-  
57 secreted transcription activator-like effectors (TALEs) during infection. TALEs enter the  
58 plant nucleus and bind to promoters, each with different sequence specificity, to  
59 transcriptionally activate effector-specific target genes (Perez-Quintero and Szurek,  
60 2019). Some of these genes, called susceptibility genes, contribute to disease  
61 development (Hutin et al., 2015). In some host genotypes, a TALE may activate a so-  
62 called executor resistance gene, leading to host cell death that stops the infection  
63 (Bogdanove et al., 2010). Most of the cloned resistance genes for bacterial blight are in  
64 fact executor genes (Zhang et al., 2015). *Xo1* is different. It mediates resistance in  
65 response to TALEs non-specifically, independent of their ability to activate transcription  
66 (Triplett et al., 2016). Also, unlike executor genes, *Xo1* function is suppressed by a

67 variant class of these effectors known as truncTALEs (also called iTALEs), which  
68 nuclear localize (Ji et al., 2016) but do not bind DNA (Read et al., 2016).

69 *Xo1* maps to a region that in the reference rice genome (cv. Nipponbare)  
70 contains seven nucleotide-binding, leucine-rich repeat protein genes (“NLR” genes)  
71 (Triplett et al., 2016). NLR genes are the largest class of plant disease resistance genes.  
72 NLR proteins recognize specific, corresponding pathogen effector proteins typically  
73 through direct or indirect protein-protein interactions, and mediate downstream defense  
74 signaling that leads to expression of defense genes and a programmed localized cell  
75 death, the hypersensitive reaction (HR) (Lolle et al., 2020). Recently, by whole genome  
76 sequencing, we determined that the *Xo1* locus in Carolina Gold comprises 14 NLR  
77 genes. We identified one of these, *Xo1<sub>11</sub>*, as a strong candidate based on its structural  
78 similarity to the previously cloned and only known NLR resistance gene for bacterial  
79 blight, *Xa1* (Read et al., 2020). *Xa1*, originally identified in the rice variety Kogyoku,  
80 maps to the same location (Yoshimura et al., 1998) and behaves similarly to *Xo1*: it  
81 responds to TALEs non-specifically (and thus confers resistance also to bacterial leaf  
82 streak), and its activity is suppressed by truncTALEs (Ji et al., 2016). *Xo1<sub>11</sub>* and *Xa1* are  
83 members of a small subfamily of NLR genes that encode an unusual N-terminal domain  
84 comprising a zinc finger BED motif (Read et al., 2020).

85 To ascertain whether *Xo1<sub>11</sub>* is the gene responsible for *Xo1* resistance, we  
86 generated transgenic Nipponbare plants expressing it. We amplified the genomic *Xo1<sub>11</sub>*  
87 coding sequence (5,882 bp) as well as the 993 bp promoter region upstream of the start  
88 codon and cloned them together into a binary vector with a 35S terminator to generate  
89 plasmid pAR902. *Agrobacterium tumefaciens* strain EHA101 carrying pAR902 was

90 used for the transformation, which was performed by the Cornell University Plant  
91 Transformation Facility. After rooting, regenerants from two independent events were  
92 moved to soil and maintained in a growth chamber. These T0 plants were inoculated by  
93 syringe infiltration with African Xoc strain CFBP7331, which has no truncTALE of its  
94 own, carrying either an empty vector (EV) or the plasmid-borne truncTALE gene *tal2h*  
95 (p2h) from the Asian Xoc strain BLS256 (Read et al., 2016). Inoculum was confirmed on  
96 untransformed Nipponbare and Carolina Gold plants (**Fig. S1**). Plants from both *Xo1*  
97 events displayed resistance to the strain with the EV, manifesting as HR (necrosis) and  
98 lack of water-soaking, and this was suppressed by *Tal2h* (**Fig. 1**), demonstrating that  
99 *Xo1<sub>11</sub>* is the *Xo1* gene.

100 NLR protein activation is characteristically followed by a suite of responses that  
101 includes massive transcriptional reprogramming leading both to HR and to activation of  
102 a large number of defense-associated genes (Cui et al., 2015). To gain insight into the  
103 nature of *Xo1*-mediated resistance, we compared the global profile of differentially  
104 expressed genes during *Xo1*-mediated defense to those of two other NLR genes in rice,  
105 and to the profile associated with an executor gene. We used our previously reported  
106 RNAseq data from Carolina Gold plants inoculated with CFBP7331(EV) or mock  
107 inoculum (Read et al., 2020), data for the NLR gene *Pia* for resistance to the rice blast  
108 pathogen *Magnaporthe oryzae* (Tanabe et al., 2014), data from rice resistant to  
109 bacterial leaf streak due to transgenic expression of the maize NLR gene *Rxo1* (Xie et  
110 al., 2007; Zhou et al., 2010), and data for the transcriptomic response associated with  
111 induction of the executor resistance gene *Xa23* by an *Xoo* strain with the corresponding  
112 TALE (Tariq et al., 2018). Differentially expressed genes ( $\log_2$ -fold change  $>1$  or  $<-1$ ; *p*-

113 value >0.05) in the comparison between pathogen-inoculated and mock-inoculated  
114 plants were compared across the four datasets. The total number of DEGs ranged from  
115 10,050 for *Xo1* to 628 for *Xa23* (**Fig. 2A, Table S1**). For each resistance gene, there  
116 were a number of DEGs found only in the pathogen to mock comparison for that dataset,  
117 and this was highest for *Xo1* (7,121 genes) (**Fig. 2A, Table S1**). These DEGs may be  
118 specific to the rice-genotype and pathogen combinations assayed, or they may be due  
119 to differences in the expression assay (RNAseq vs. microarray), annotation, or  
120 timepoints used. Overall, the DEG profile for *Xo1* was more similar to those of *Pia* and  
121 *Rxo1* than to the profile for *Xa23* (**Fig. 2A**). This was even more apparent when the  
122 expression of 340 rice genes associated with plant defense response (gene ontology  
123 group 0006952) was examined (**Fig. 2B**). The *Xo1* profile comprised the largest number  
124 of plant defense DEGs (99), and these included 16 of 26 total defense DEGs for *Rxo1*,  
125 26 of 46 for *Pia*, and 8 of only 14 for *Xa23* (**Fig. 2B and Table S2**).

126 We also compared DEGs relative to mock in Carolina Gold plants inoculated with  
127 CFBP7331(EV) and Carolina Gold plants inoculated with CFBP7331(p2h) (Read et al.,  
128 2020), to gain insight into how *Xo1*-mediated resistance is overcome by a pathogen  
129 delivering a truncTALE. In contrast to the 99 defense response genes differentially  
130 expressed in response to CFBP7331(EV), only 18 defense genes were differentially  
131 expressed in response to CFBP7331(p2h) (**Fig. 2C**). Of these 18 genes, 7 were  
132 differentially expressed only in the response to the strain with *tal2h*, 4 up and 3 down.  
133 Of the remaining 11, 3 were up and 2 were down in both responses, but each less so in  
134 the response to the strain with *tal2h*. The other 6 moved in opposite directions entirely,  
135 up in the absence but repressed in the presence of *tal2h*, relative to mock. This

136 expression profile during suppression of *Xo1*-mediated resistance is consistent with  
137 Tal2h functioning early in the defense cascade. Interestingly, the *Xoc* susceptibility gene  
138 *OsSULTR3;6* is strongly induced by both CFBP7331(EV) and CFBP7331(p2h),  
139 indicating that TALE function is not compromised by *Xo1* or by Tal2h.

140         The observation that *Xo1* reprograms transcription in a manner consistent with  
141 other rice NLR proteins upon recognition of the cognate pathogen effector and that  
142 reprogramming by *Xo1* is essentially blocked by Tal2h led us to explore whether *Xo1*  
143 localizes to the same subcellular location as TALEs and truncTALEs. Some, but not all,  
144 NLR proteins nuclear localize (Shen et al., 2007; Wirthmueller et al., 2007; Caplan et al.,  
145 2008; Cheng et al., 2009), and we previously identified putative nuclear localization  
146 signals (NLSs) in *Xo1*<sub>11</sub> (Read et al., 2020). We generated expression constructs for a  
147 green fluorescent protein (GFP) fusion to the N-terminus of *Xo1* as well as an N-  
148 terminal monomeric red fluorescent protein (mRFP) fusion both to a TALE (Tal1c of *Xoc*  
149 BLS256) and to Tal2h. These constructs were delivered into *Nicotiana benthamiana*  
150 leaves using *A. tumefaciens* strain GV3101, and the leaves imaged with a Zeiss 710  
151 confocal microscope (**Fig. 3**). GFP-*Xo1* in the absence of either effector but with free  
152 mRFP localized to foci that appeared to be nuclei. Co-expression with mRFP-Tal1c or  
153 with mRFP-Tal2h confirmed that these foci were nuclei.

154         The localization of *Xo1*, the TALE, and the truncTALE to the nucleus when  
155 transiently expressed in *N. benthamiana* led us to pursue the hypothesis that *Xo1*  
156 physically interacts with one or both of these proteins in the native context. We  
157 generated plasmid constructs that add a 3x FLAG tag to the C-terminus of Tal1c or  
158 Tal2h (Tal1c-FLAG and Tal2h-FLAG) and introduced them individually into the TALE-

159 deficient *X. oryzae* strain X11-5A (Triplett et al., 2011) for co-immunoprecipitation from  
160 inoculated Carolina Gold leaves (**Fig. 4**). We included also a plasmid for expression of a  
161 second, untagged TALE (Tal3c from BLS256) and a plasmid for untagged Tal2h. By  
162 pairing the X11-5A transformants with each other or with the untransformed control  
163 strain, we were able to probe for Carolina Gold proteins interacting with the tagged  
164 TALE or truncTALE, and for interactions of these proteins with each other or with the  
165 second TALE. Select combinations were inoculated to Nipponbare leaves for  
166 comparison. Inoculation was done by syringe infiltration, in 30-40 contiguous spots on  
167 each side of the leaf midrib. For each co-inoculation, tissue was harvested at 48 hours  
168 and ground in liquid N<sub>2</sub>, then soluble extract was incubated with anti-FLAG agarose  
169 beads and washed to immunopurify the tagged and interacting proteins.  
170 Immunoprecipitates were eluted, and an aliquot of each was subjected to western  
171 blotting with anti-TALE antibody (**Fig. S2**). The remainders were then resolved on a 4-  
172 20% SDS-PAGE and eluates from gel slices containing proteins between approximately  
173 60 and 300 kDa (**Fig. S3**) were digested and the peptides analyzed by mass  
174 spectrometry. Proteins were considered present in a sample if at least three peptides  
175 mapped uniquely to any of the pertinent annotated genomes searched: the *X. oryzae*  
176 strain X11-5A genome (Triplett et al., 2011) plus the TALE(s) or TruncTALE being  
177 expressed, the Nipponbare genome (MSU 7; Kawahara et al., 2013), and the Carolina  
178 Gold genome (Read et al., 2020). For the Carolina Gold genome, we re-annotated  
179 using the RNAseq data from CFBP7331(EV), CFBP7331(p2h), and mock-inoculated  
180 plants cited earlier. We carried out the experiment twice.



181 In the western blot for each experiment (**Fig. S2**), we detected the tagged TALE  
182 or truncTALE in each corresponding sample, with the exception of a Tal1c-  
183 FLAG/Tal3c/Nipponbare sample in the first experiment. No Tal3c or untagged Tal2h  
184 was detected in any sample. The mass spectrometry confirmed these observations,  
185 suggesting that neither TALEs with truncTALEs nor TALEs with other TALEs interact  
186 appreciably (**Fig. 4**). Xo1 was consistently detected in the Carolina Gold/Tal2h-FLAG  
187 samples, irrespective of any co-delivered Tal1c or Tal3c, and not in any other sample  
188 (**Fig. 4**). No other protein consistently co-purified with Tal2h-FLAG or Tal1c-FLAG in  
189 either Carolina Gold or Nipponbare samples (**Dataset S1**).

190 In summary, we have shown that 1) an NLR protein gene at the *Xo1* locus,  
191 harboring an integrated zfBED domain, is *Xo1*; 2) the *Xo1*-mediated response is similar  
192 to those mediated by two other NLR resistance genes and distinct from that associated  
193 with TALE-specific transcriptional activation of an executor resistance gene; 3) a  
194 truncTALE abolishes or dampens activation of defense-associated genes by *Xo1*; 4) the  
195 *Xo1* protein, like TALEs and truncTALEs, localizes to the nucleus, and 5) *Xo1*  
196 specifically co-immunoprecipitates from rice leaves with a pathogen-delivered, epitope-  
197 tagged truncTALE. Thus, *Xo1* is an allele or paralog of *Xa1*, and suppression of *Xo1*  
198 function by a truncTALE is likely the result of physical interaction between the  
199 resistance protein and the effector.

200 Whether the interaction is direct or indirect is not certain, but that fact that no  
201 other protein was detected consistently that co-immunoprecipitated with Tal2h and *Xo1*  
202 suggests the interaction is direct. It is tempting to speculate that TALEs trigger *Xo1*-  
203 mediated resistance also by direct interaction with the protein and that truncTALEs

204 function by disrupting the association. This is consistent with the results of our  
205 comparative analysis of the Xo1 DEG profile during TALE-triggered HR, which showed  
206 it to be a typical NLR protein-mediated response and thus plausibly the result of direct  
207 interaction with the TALE. And it is consistent with the Xo1 DEG profile during  
208 suppression by Tal2h, which suggested that Tal2h functions early in the defense  
209 cascade, perhaps by blocking TALE recognition. While tagged Tal1c did not detectably  
210 pull down Xo1, it is possible that the interaction might be weak, or transient, or that any  
211 complex of the proteins in the plant cells had begun to degrade with the developing HR  
212 at the 48 hour time point sampled. An alternative hypothesis is that Tal2h interacts with  
213 TALEs and masks them from the resistance protein, but both our co-  
214 immunoprecipitation results and the fact that Tal2h did not impact TALE activation of the  
215 *OsSULTR3;6* susceptibility suggest that this is not the case.

216         The results presented constitute an important step toward understanding how  
217 Xo1 works, and how its function can be suppressed by the pathogen. An immediate  
218 next step might be to determine the portion(s) of Xo1 involved in its interaction with  
219 Tal2h. Our previous comparison of the motifs present in Xo1<sub>11</sub>, Xa1, and the closest  
220 Nipponbare homolog (Nb-xo1<sub>5</sub>, which is expressed) revealed that the zfBED and CC  
221 domains are identical and the NB-ARC domains nearly so (Read et al., 2020). In  
222 contrast, the leucine rich repeat domain of Nb-xo1<sub>5</sub> differs markedly from those of Xo1  
223 and Xa1, which, with the exception of an additional repeat in Xa1, are very similar. Thus,  
224 the LRR may be the determinative interacting domain. Supporting this hypothesis,  
225 differences in the LRR determine the pathogen race specificities of some flax rust  
226 resistance genes (Ellis et al., 1999). More broadly, the ability of tagged Tal2h to pull

227 down Xo1 suggests that effector co-immunoprecipitation may be an effective approach  
228 to characterizing pathogen recognition mechanisms of other resistance proteins, or for  
229 identifying a resistance gene *de novo*.

230

231

## 232 **Figure legends**

233

234 **Fig. 1.** Transgenic Nipponbare plants expressing Xo1<sub>11</sub> are resistant to African Xoc  
235 strain CFBP7331 and the resistance suppressed by a truncTALE. Susceptible cultivar  
236 Nipponbare was transformed with pAR902, and leaves of T0 plants from two events  
237 were syringe-infiltrated with African Xoc strain CFBP7311 carrying either empty vector  
238 (EV) or *tal2h* (p2h) adjusted to OD<sub>600</sub> 0.4. Leaves were photographed on a light box at 4  
239 days after inoculation. Resistance is apparent as HR (necrosis) at the site of inoculation  
240 and disease as expanded, translucent watersoaking.

241

242 **Fig. 2.** The Xo1-mediated transcriptomic response is similar to those of other NLR  
243 genes and is essentially eliminated by Tal2h. **A**, Expression heatmaps (columns)  
244 showing all differentially expressed genes (DEGs) in plants undergoing the resistant  
245 response compared to mock inoculated plants for Xo1, the NLR genes *Pia* and *Rxo1*,  
246 and the executor resistance gene *Xa23*. White numbers for each on the heatmap  
247 indicate the number of DEGs specific to each response (see **Table S1**). Total numbers  
248 of DEGs are indicated below. **B**, Heatmaps for the subset of DEGs from (A) that belong  
249 to gene ontology group 0006952, defense response, with totals displayed at bottom. **C**,

250 Heatmaps for the 18 defense response DEGs identified in the comparison of Carolina  
251 Gold plants inoculated with CFBP7331(p2h) to mock inoculated plants. The “EV”  
252 heatmap shows their expression relative to mock in Carolina Gold plants inoculated with  
253 CFBP7331(EV) (resistance), and the “p2h” column shows their expression relative to  
254 mock in the presence of Tal2h (disease). The DEGs have been divided into five  
255 categories: **I**, induced in both; **II**, down-regulated in both; **III**, down-regulated in  
256 resistance and induced in disease; **IV**, not differentially expressed in resistance and  
257 down-regulated in disease; and **V**, not differentially expressed in resistance and induced  
258 in disease.

259

260 **Fig. 3.** Xo1 localizes to the nucleus. Using *Agrobacterium* co-infiltrations, an expression  
261 construct for Xo1 with GFP at the N-terminus (GFP-Xo1) together with a p19 silencing  
262 suppressor construct were introduced into *Nicotiana benthamiana* leaves alone or with  
263 a construct for mRFP, mRFP fused to TALE Tal1c (mRFP-Tal1c), or mRFP fused to the  
264 truncTALE Tal2h (mRFP-Tal2h). Confocal image stacks were taken at 3 days after  
265 inoculation and are presented as maximum intensity projections. Insets are  
266 magnifications of individual nuclei. The scale bars represent 50  $\mu\text{m}$ .

267

268 **Fig. 4.** Xo1 co-immunoprecipitates with Tal2h. **Top**, strategy used for co-  
269 immunoprecipitation (Co-IP) of truncTALE Tal2h or TALE Tal1c and any interactors.  
270 Plasmid borne expression constructs for Tal2h or Tal1c with a C-terminal 3x FLAG tag,  
271 as well as untagged Tal2h and a second TALE, Tal3c were introduced into  
272 *Xanthomonas oryzae* strain X11-5. Paired combinations of the transformants with each

273 other or with the untransformed control strain, or the control strain alone, were co-  
274 infiltrated into leaves of rice varieties Carolina Gold and Nipponbare at a final OD<sub>600</sub> 0.5  
275 for each transformant. Samples were collected 48 hours after inoculation, ground, and  
276 sonicated before Co-IP using anti-FLAG agarose beads. After elution and SDS-PAGE  
277 separation, proteins between approximately 60 and 300 kDa were eluted, digested and  
278 analyzed by mass spectrometry. The experiment was conducted twice. **Bottom**, co-IP  
279 results. For each immunoprecipitate, the numbers of unique peptides detected that  
280 matched Tal2h, Tal3c, Tal1c, or Xo1 in each experiment are shown. “-” indicates that ≤  
281 2 unique peptides were detected.

282

283

## 284 **Acknowledgments**

285

286 The authors thank M. Carter and B. Szurek for critical reading of the manuscript,  
287 Matthew Willmann and the Plant Transformation Facility of Cornell's School of  
288 Integrative Plant Science for carrying out the rice transformation, Sandra Harrington and  
289 Susan McCouch for assistance growing the regenerants, and Ruchika Bhawal and  
290 Elizabeth Anderson at the Proteomics Facility of the Biotechnology Resource Center at  
291 the Cornell University's Institute of Biotechnology (BRC) for conducting the mass  
292 spectrometry. Confocal microscopy was carried out at the BRC's Imaging Facility. This  
293 work was supported by the Plant Genome Research Program of the National Science  
294 Foundation (IOS-1444511 to AB), the National Institute of Food and Agriculture of the  
295 U.S. Department of Agriculture (2018-67011-28025 to AR), and the Gatsby Charitable

296 Foundation (to MM). We also acknowledge support from the National Institutes of  
297 Health to the Proteomics Facility for the Orbitrap Fusion mass spectrometer (shared  
298 instrumentation grant 1S10 OD017992-01) and to the Imaging Facility for the Zeiss LSM  
299 710 confocal microscope (shared instrumentation grant S10RR025502).

300

301

## 302 **Author contributions**

303

304 AR, MH, FR, and AB conceived and designed the study; AR, MH, and FR carried out  
305 the experiments; AR, MH, FR, MM, and AB analyzed data; AR, MH, and AB wrote the  
306 manuscript.

307

308

## 309 **Supplemental files**

310

### 311 **1. Supplemental text and figures**

312

#### 313 **Materials and methods**

314

315 **Fig. S1.** Confirmation of CFBP7331(EV) and CFBP(p2h) inoculum on  
316 Nipponbare and Carolina Gold plants

317

318 **Fig. S2.** Western blot of immunoprecipitates using anti-TALE antibody

319

320 **Fig. S3.** SDS-PAGE of immunoprecipitates and size range excised for mass  
321 spectrometry

322

323 **Supplemental references**

324

325 **2. Supplemental tables**

326

327 **Table S1.** DEGs in Fig. 2A (all DEGS)

328

329 **Table S2.** DEGs in Fig. 2B (GO:0006952 DEGs)

330

331 **Table S3.** DEGs in Fig. 2C (GO:0006952 in disease)

332

333 **3. Dataset S1.** Mass spectrometry data

334

335

336 **References**

337

338 Bogdanove, A.J., Schornack, S., and Lahaye, T. 2010. TAL effectors: finding plant  
339 genes for disease and defense. *Curr. Opin. Plant Biol.* 13:394-401.

- 340 Caplan, J.L., Mamillapalli, P., Burch-Smith, T.M., Czymmek, K., and Dinesh-Kumar, S.P.  
341 2008. Chloroplastic protein NRIP1 mediates innate immune receptor recognition  
342 of a viral effector. *Cell* 132:449-462.
- 343 Cheng, Y.T., Germain, H., Wiermer, M., Bi, D., Xu, F., Garcia, A.V., Wirthmueller, L.,  
344 Despres, C., Parker, J.E., Zhang, Y., and Li, X. 2009. Nuclear pore complex  
345 component MOS7/Nup88 is required for innate immunity and nuclear  
346 accumulation of defense regulators in Arabidopsis. *Plant Cell* 21:2503-2516.
- 347 Cui, H., Tsuda, K., and Parker, J.E. 2015. Effector-triggered immunity: from pathogen  
348 perception to robust defense. *Annu. Rev. Plant Biol.* 66:487-511.
- 349 Ellis, J.G., Lawrence, G.J., Luck, J.E., and Dodds, P.N. 1999. Identification of regions in  
350 alleles of the flax rust resistance gene *L* that determine differences in gene-for-  
351 gene specificity. *Plant Cell* 11:495-506.
- 352 Hutin, M., Perez-Quintero, A.L., Lopez, C., and Szurek, B. 2015. MorTAL Kombat: the  
353 story of defense against TAL effectors through loss-of-susceptibility. *Front. Plant*  
354 *Sci.* 6:535.
- 355 Ji, Z., Ji, C., Liu, B., Zou, L., Chen, G., and Yang, B. 2016. Interfering TAL effectors of  
356 *Xanthomonas oryzae* neutralize *R*-gene-mediated plant disease resistance. *Nat.*  
357 *Commun.* 7:13435.
- 358 Kawahara, Y., de la Bastide, M., Hamilton, J.P., Kanamori, H., McCombie, W.R.,  
359 Ouyang, S., Schwartz, D.C., Tanaka, T., Wu, J., and Zhou, S. 2013.  
360 Improvement of the *Oryza sativa* Nipponbare reference genome using next  
361 generation sequence and optical map data. *Rice* 6:4.



- 362 Lolle, S., Stevens, D., and Coaker, G. 2020. Plant NLR-triggered immunity: from  
363 receptor activation to downstream signaling. *Curr. Opin. Immunol.* 62:99-105.
- 364 McClung, A., and Fjellstrom, R. 2010. Using molecular genetics as a tool to identify and  
365 refine “Carolina Gold”. Pages 37-41 in: *The Golden Seed: Writings on the History*  
366 *and Culture of Carolina Gold Rice*, D.S. Shields, ed. Douglas W. Bostick for the  
367 Carolina Gold Rice Foundation.
- 368 Perez-Quintero, A.L., and Szurek, B. 2019. A decade decoded: spies and hackers in the  
369 history of TAL effectors research. *Annu. Rev. Phytopathol.* 57:459-481.
- 370 Read, A.C., Rinaldi, F.C., Hutin, M., He, Y.Q., Triplett, L.R., and Bogdanove, A.J. 2016.  
371 Suppression of *Xo1*-mediated disease resistance in rice by a truncated, non-  
372 DNA-binding TAL effector of *Xanthomonas oryzae*. *Front. Plant Sci.* 7:1516.
- 373 Read, A.C., Moscou, M.J., Zimin, A.V., Pertea, G., Meyer, R.S., Purugganan, M.D.,  
374 Leach, J.E., Triplett, L.R., Salzberg, S.L., and Bogdanove, A.J. 2020. Genome  
375 assembly and characterization of a complex zfBED-NLR gene-containing  
376 disease resistance locus in Carolina Gold Select rice with Nanopore sequencing.  
377 *PLoS Genet.* 16:e1008571.
- 378 Shen, Q.H., Saijo, Y., Mauch, S., Biskup, C., Bieri, S., Keller, B., Seki, H., Ulker, B.,  
379 Somssich, I.E., and Schulze-Lefert, P. 2007. Nuclear activity of MLA immune  
380 receptors links isolate-specific and basal disease-resistance responses. *Science*  
381 315:1098-1103.
- 382 Tanabe, S., Yokotani, N., Nagata, T., Fujisawa, Y., Jiang, C., Abe, K., Ichikawa, H.,  
383 Mitsuda, N., Ohme-Takagi, M., Nishizawa, Y., and Minami, E. 2014. Spatial  
384 regulation of defense-related genes revealed by expression analysis using

- 385 dissected tissues of rice leaves inoculated with *Magnaporthe oryzae*. J. Plant  
386 Physiol. Pathol. 2:1000135.
- 387 Tariq, R., Wang, C., Qin, T., Xu, F., Tang, Y., Gao, Y., Ji, Z., and Zhao, K. 2018.  
388 Comparative transcriptome profiling of rice near-isogenic line carrying *Xa23*  
389 under infection of *Xanthomonas oryzae* pv. *oryzae*. Int. J. Mol. Sci. 19:717.
- 390 Triplett, L.R., Hamilton, J.P., Buell, C.R., Tisserat, N.A., Verdier, V., Zink, F., and Leach,  
391 J.E. 2011. Genomic analysis of *Xanthomonas oryzae* isolates from rice grown in  
392 the United States reveals substantial divergence from known *X. oryzae*  
393 pathovars. Appl. Environ. Microbiol. 77:3930-3937.
- 394 Triplett, L.R., Cohen, S.P., Heffelfinger, C., Schmidt, C.L., Huerta, A.I., Tekete, C.,  
395 Verdier, V., Bogdanove, A.J., and Leach, J.E. 2016. A resistance locus in the  
396 American heirloom rice variety Carolina Gold Select is triggered by TAL effectors  
397 with diverse predicted targets and is effective against African strains of  
398 *Xanthomonas oryzae* pv. *oryzicola*. Plant J. 87:472-483.
- 399 Wirthmueller, L., Zhang, Y., Jones, J.D., and Parker, J.E. 2007. Nuclear accumulation of  
400 the Arabidopsis immune receptor RPS4 is necessary for triggering EDS1-  
401 dependent defense. Curr. Biol. 17:2023-2029.
- 402 Xie, X.W., Yu, J., Xu, J.L., Zhou, Y.L., and Li, Z.K. 2007. [Introduction of a non-host  
403 gene *Rxo1* cloned from maize resistant to rice bacterial leaf streak into rice  
404 varieties]. Sheng Wu Gong Cheng Xue Bao 23:607-611.
- 405 Yoshimura, S., Yamanouchi, U., Katayose, Y., Toki, S., Wang, Z.X., Kono, I., Kurata, N.,  
406 Yano, M., Iwata, N., and Sasaki, T. 1998. Expression of *Xa1*, a bacterial blight-

407 resistance gene in rice, is induced by bacterial inoculation. Proc. Natl. Acad. Sci.  
408 USA 95:1663-1668.

409 Zhang, J., Yin, Z., and White, F. 2015. TAL effectors and the executor *R* genes. Front.  
410 Plant Sci. 6:641.

411 Zhou, Y.L., Xu, M.R., Zhao, M.F., Xie, X.W., Zhu, L.H., Fu, B.Y., and Li, Z.K. 2010.  
412 Genome-wide gene responses in a transgenic rice line carrying the maize  
413 resistance gene *Rxo1* to the rice bacterial streak pathogen, *Xanthomonas oryzae*  
414 pv. *oryzicola*. BMC Genomics 11:78.

415

# Xoc CFBP7331

---

Event 1

Event 2

EV      p2h

EV      p2h

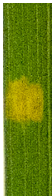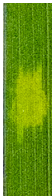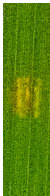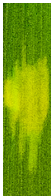

R

D

R

D

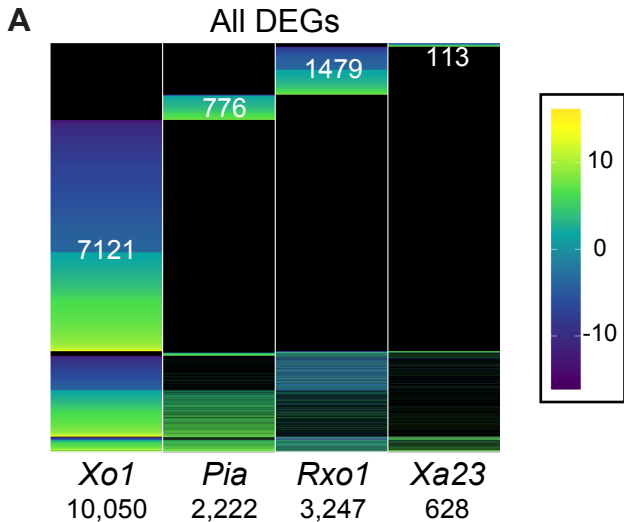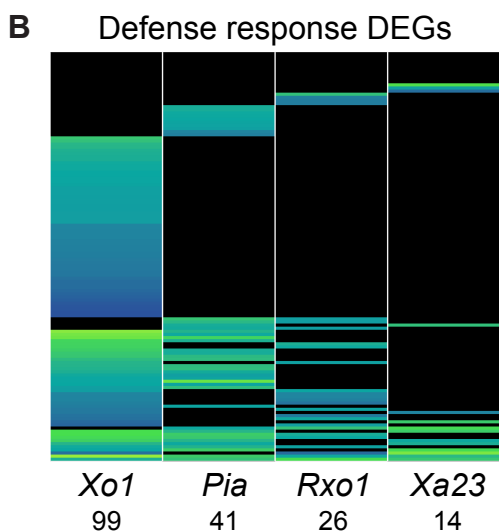

**C** Defense response DEGs in disease

|     |          |  |                                          |
|-----|----------|--|------------------------------------------|
| I   | 09g34160 |  | resistance protein                       |
|     | 07g23470 |  | thaumatin                                |
|     | 03g45960 |  | thaumatin                                |
|     | 07g38810 |  | lectin receptor-type protein kinase      |
| II  | 08g29370 |  | peptidyl-prolyl cis-trans isomerase      |
|     | 04g58710 |  | AMP-binding domain containing protein    |
| III | 12g36880 |  | pathogenesis-related Bet v I family      |
|     | 12g36850 |  | pathogenesis-related Bet v I family      |
|     | 03g55240 |  | cytochrome P450                          |
|     | 08g42800 |  | expressed protein                        |
|     | 01g06740 |  | ribosome inactivating protein            |
| IV  | 07g18750 |  | LTPL42 - Protease inhibitor/seed storage |
|     | 01g68589 |  | LTPL39 - Protease inhibitor/seed storage |
|     | 06g37690 |  | S-locus-like receptor protein kinase     |
|     | 02g41890 |  | phytosulfokine receptor precursor        |
| V   | 09g34150 |  | NBS-LRR disease resistance protein       |
|     | 02g50340 |  | membrane attack/perforin/complement      |
|     | 07g03920 |  | lectin-like receptor kinase 7            |

p2h EV

Red

Green

Merged

mRFP / GFP-Xo1

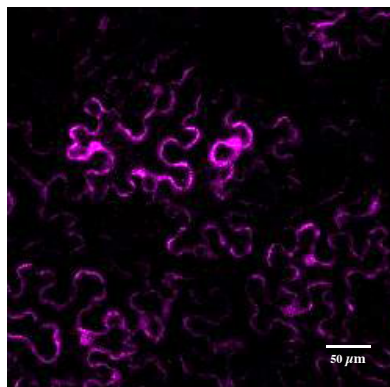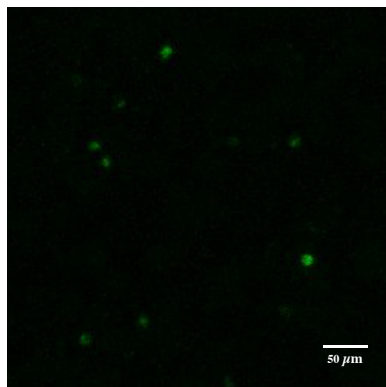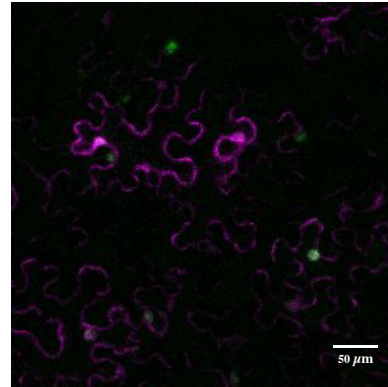

mRFP-Tal1c / GFP-Xo1

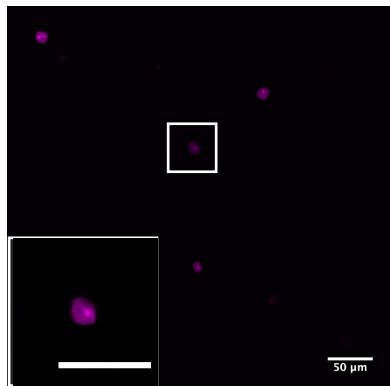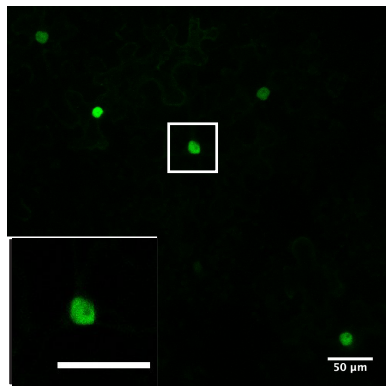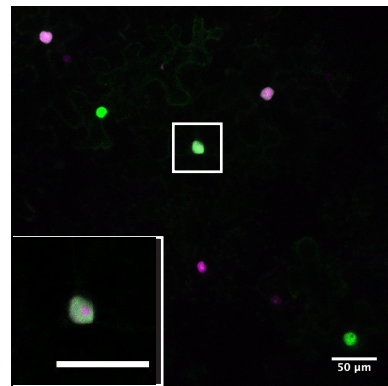

mRFP-Tal2h / GFP-Xo1

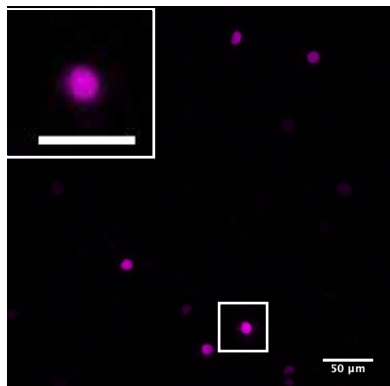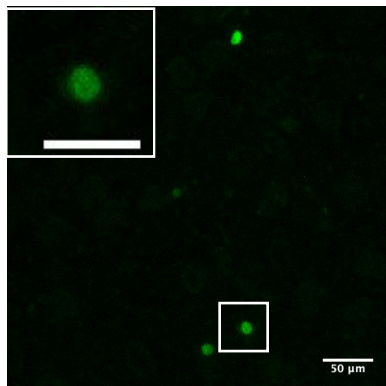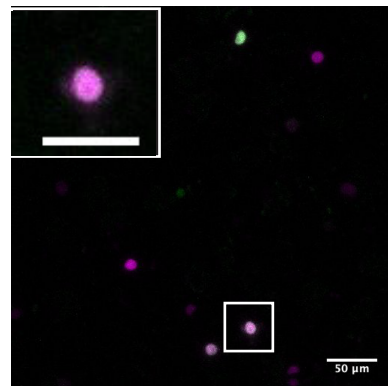

Source: https://www.biorxiv.org/content/10.1101/2020.05.26.116731v1.full.pdf
